# Supplementary material for: RefPlantNLR is a comprehensive collection of experimentally validated plant disease resistance proteins from the NLR family
Source: PubMed Central journal article supplement (PMC8559963; doi:10.1371/journal.pbio.3001124), 2021-10-20
Supplement: pbio.3001124.s031.pdf [file pbio.3001124.s031.pdf]

### Domains

- R1
- CC
- RPW8
- TIR
- NB-ARC
- LRR
- C-JID
- OTHER

### Subclass

- TIR-NLRs
- CC<sub>R</sub>-NLRs
- CC<sub>G10</sub>-NLRs
- CC-NLRs
- Non-plant NLR

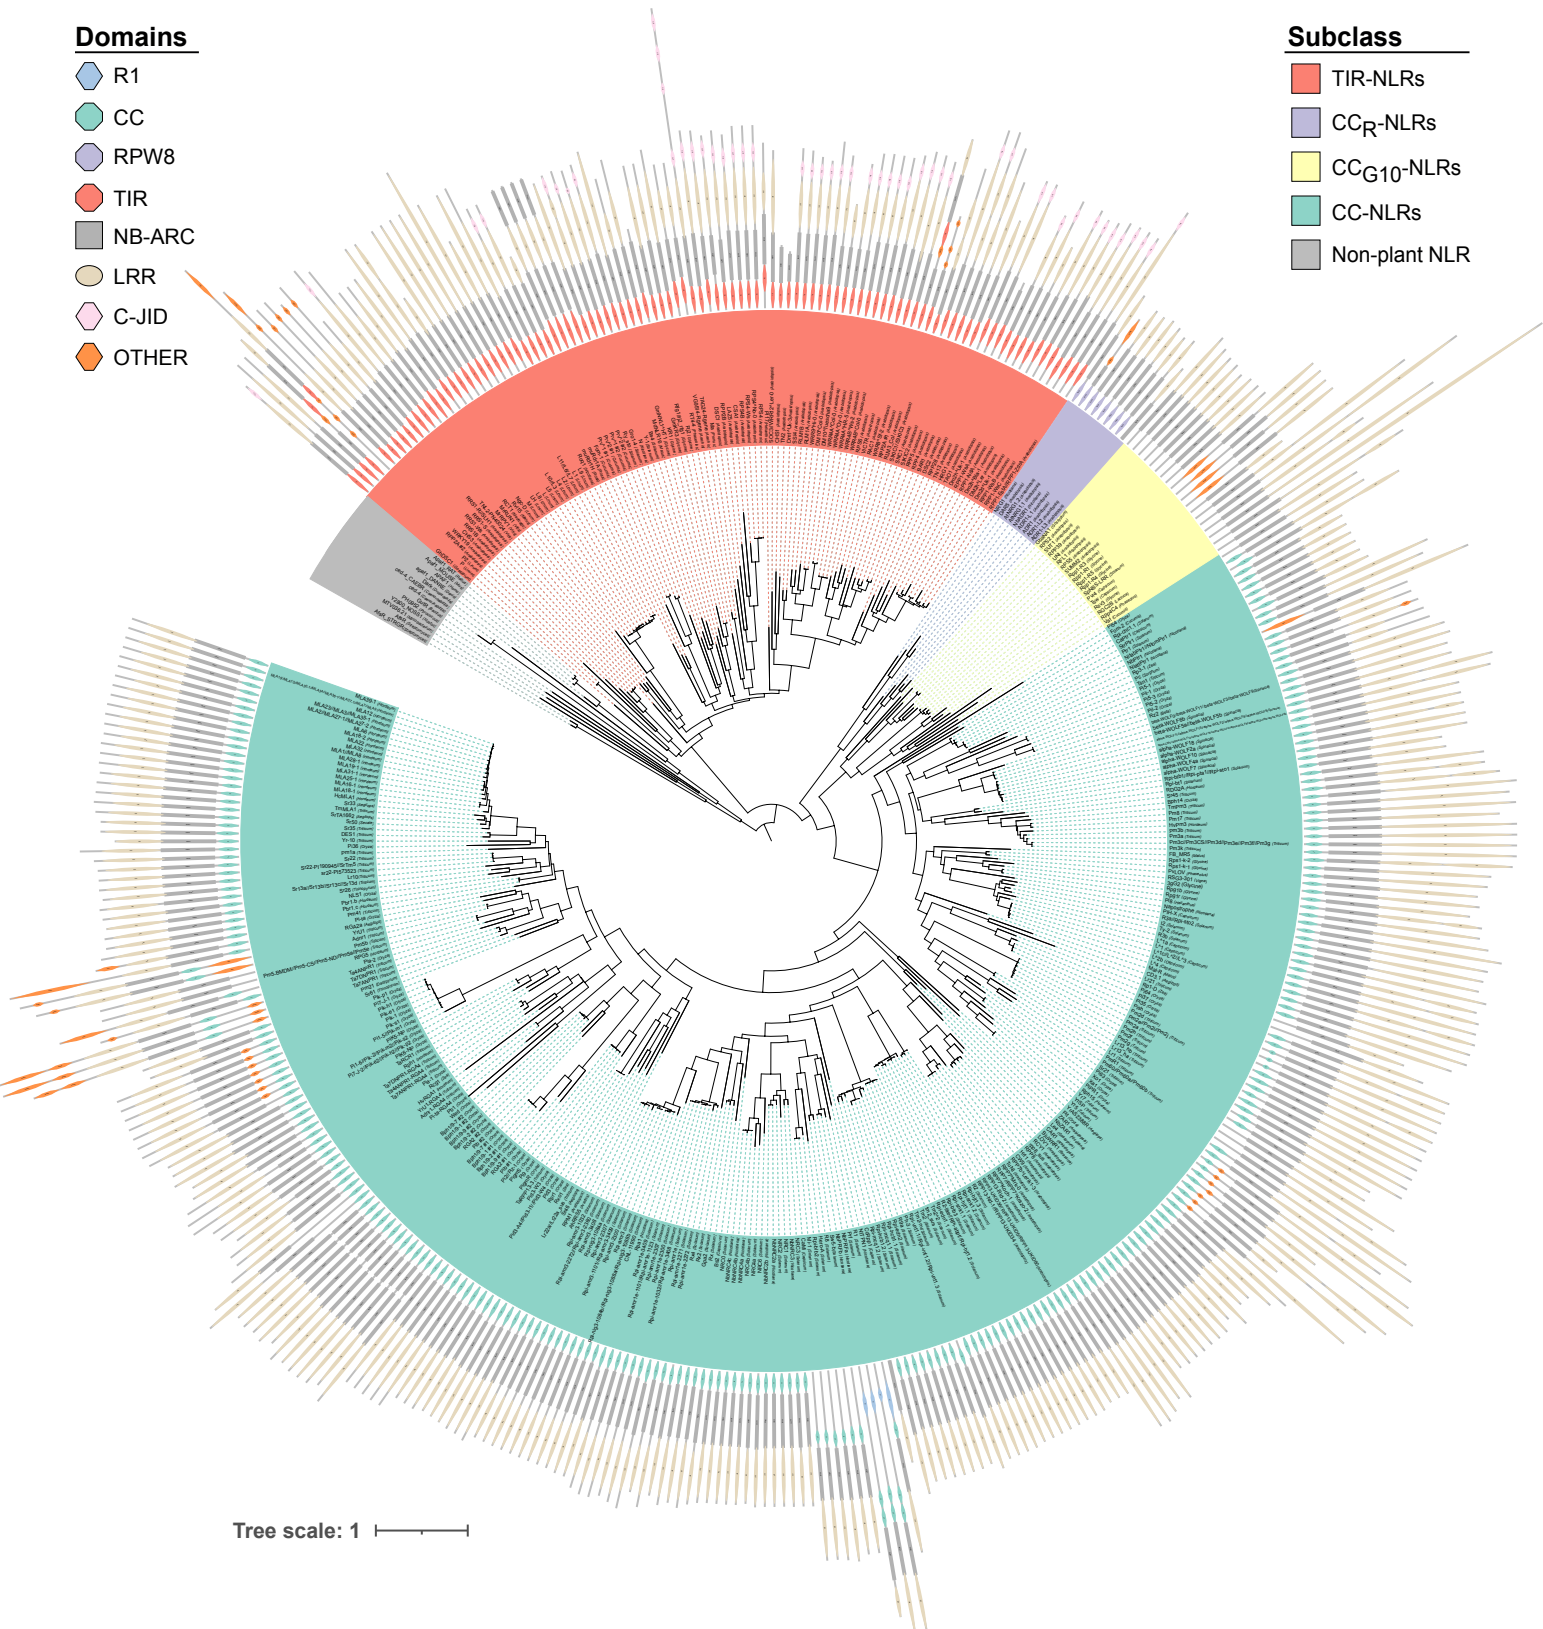

Tree scale: 1
